# Supplementary material for: Process standardization and evaluation of free flowing dragon fruit powder
Source: Research Square preprint supplement (doi:10.21203/rs.3.rs-7516976/v1), 2025-09-16
Supplement: Supplementary file 1 [file 853be78a5871448a8d355f18.docx]

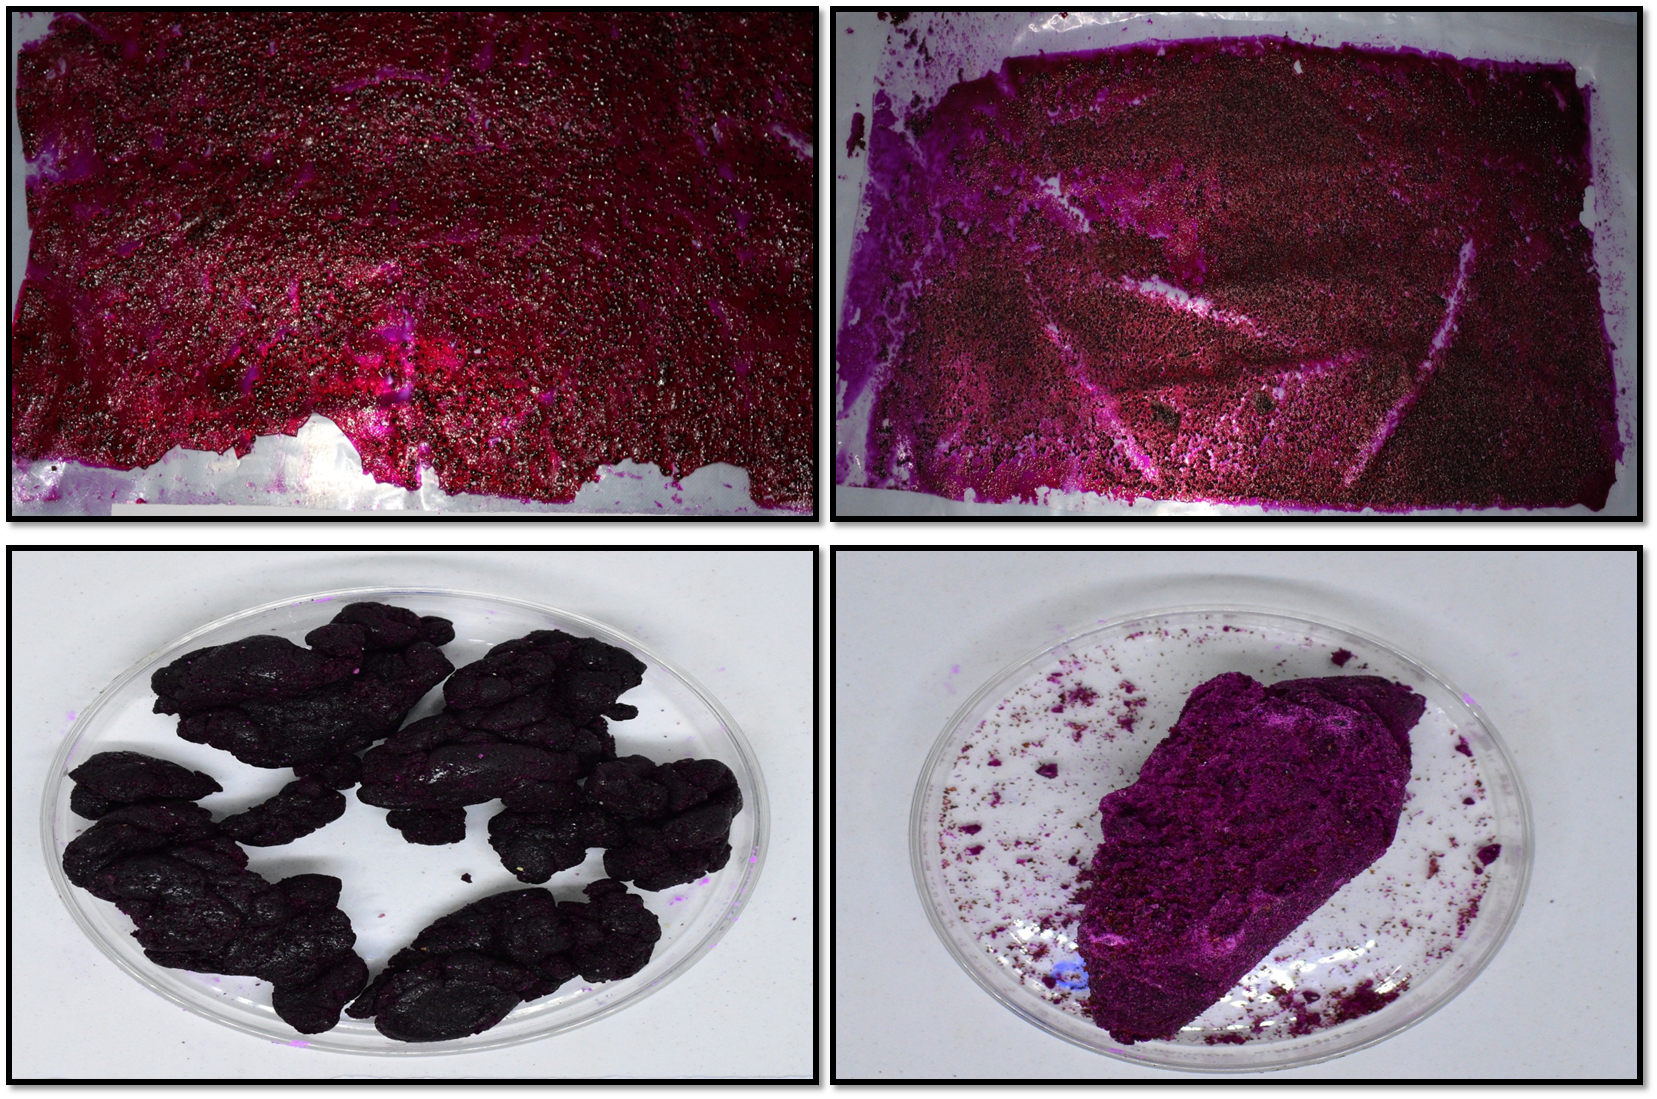


**Plate 1: Different additive combinations failed responce to produce free flowing dragon fruit powder**


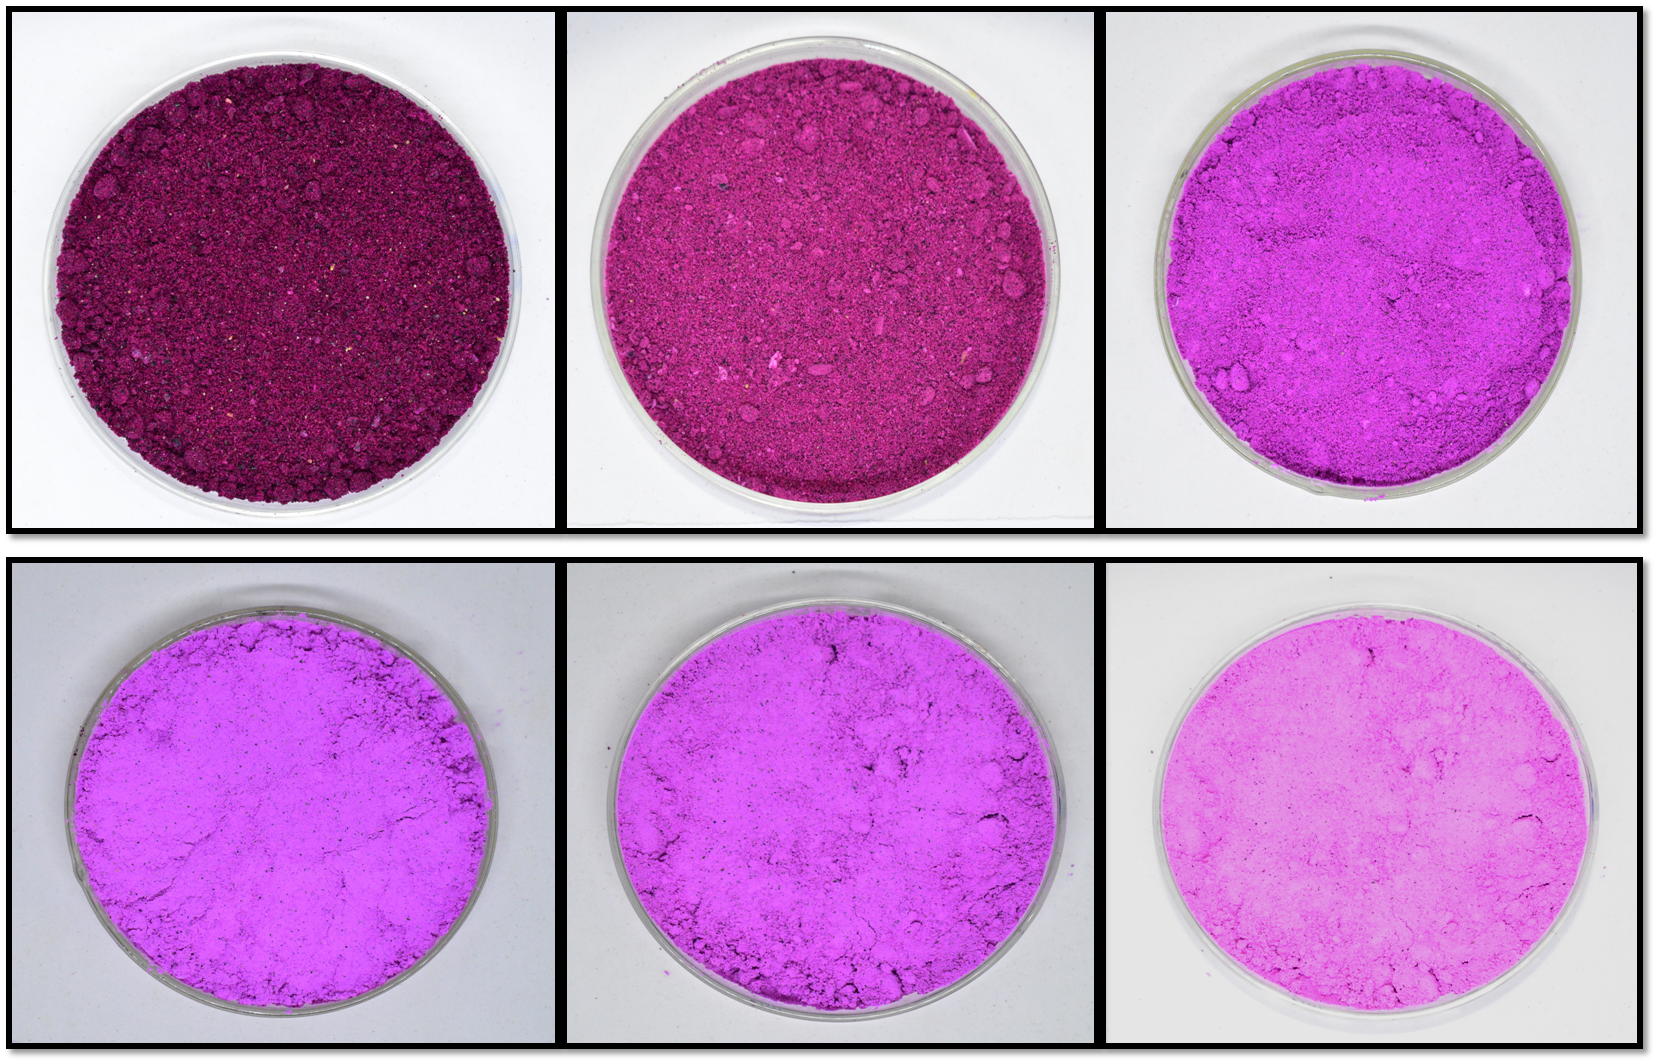


**Plate 2: Dragon fruit powder produced using different levels of additive combination-3 (Predominantly cornstarch)**
